# Supplementary material for: Pseudmonas cannabina pv. alisalensis TrpA Is Required for Virulence in Multiple Host Plants
Source: Front Microbiol. 2021 Apr 20;12:659734. doi: 10.3389/fmicb.2021.659734 (PMC8093880; doi:10.3389/fmicb.2021.659734)
Supplement: Supplementary file 2 [file Data_Sheet_2.xlsx]

## Sheet: Figure1
5dpi	Weght (g)	Colony number	Dilution	CFU	CFU/cm2	Log(CFU/cm2)	Ave	SE				Log(CFU/cm2)	SE			Tukey's HSD test
WT	1.5386	91	20000	1820000	1.18289e+06	6.07295	5.50927	0.198064			WT	5.50927	0.198064			SampleA-SampleB	p-value
	1.5386	49	20000	980000	636943	5.8041					NB35	4.81906	0.0500954			NF2-NB35	1.34e-05
	1.5386	42	20000	840000	545951	5.73715					NF2	2.59189	0.549084			NF34-NB35	0.62305
	1.5386	17	20000	340000	220980	5.34435					NF34	5.51588	0.0681759			NH11-NB35	0.0065846
	1.5386	37	2000	74000	48095.7	4.68211					NH11	6.35191	0.18407			NI13-NB35	1
	1.5386	20	20000	400000	259977	5.41493					NI13	4.83842	0.15047			NM37-NB35	0.248024
NB35	1.5386	61	2000	122000	79292.9	4.89923	4.81906	0.0500954			NM37	5.7655	0.222938			NN31-NB35	0.428858
	1.5386	35	2000	70000	45495.9	4.65797					NN31	5.63375	0.191822			WT-NB35	0.841205
	1.5386	55	2000	110000	71493.6	4.85427										NF34-NF2	0
	1.5386	36	2000	72000	46795.8	4.67021										NH11-NF2	0
	1.5386	61	2000	122000	79292.9	4.89923										NI13-NF2	1.14e-05
	1.5386	66	2000	132000	85792.3	4.93345										NM37-NF2	0
NF2	1.5386	22	2000	44000	28597.4	4.45633	2.59189	0.549084								NN31-NF2	0
	1.5386	6	200	1200	779.93	2.89206										WT-NF2	3e-07
	1.5386	3	20000	60000	38996.5	4.59103										NH11-NF34	0.395984
	1.5386	1	20	20	12.9988	1.1139										NI13-NF34	0.655102
	1.5386	7	20	140	90.9918	1.959										NM37-NF34	0.997917
	1.5386	8	20	160	103.991	2.01699										NN31-NF34	0.999986
	1.5386	1	20	20	12.9988	1.1139										WT-NF34	0.999989
NF34	1.5386	37	20000	740000	480957	5.68211	5.51588	0.0681759								NI13-NH11	0.007584
	1.5386	40	20000	800000	519953	5.71596										NM37-NH11	0.794589
	1.5386	30	20000	600000	389965	5.59103										NN31-NH11	0.587362
	1.5386	18	20000	360000	233979	5.36918										WT-NH11	0.291134
	1.5386	19	20000	380000	246978	5.39266										NM37-NI13	0.270965
	1.5386	17	20000	340000	220980	5.34435										NN31-NI13	0.459601
NH11	1.5386	45	200000	9000000	5.84947e+06	6.76712	6.35191	0.18407								WT-NI13	0.862863
	1.5386	76	200000	15200000	9.87911e+06	6.99472										NN31-NM37	0.999969
	1.5386	18	200000	3600000	2.33979e+06	6.36918										WT-NM37	0.983425
	1.5386	112	20000	2240000	1.45587e+06	6.16312										WT-NN31	0.99889
	1.5386	58	20000	1160000	753932	5.87733
	1.5386	67	20000	1340000	870922	5.93998
NI13	1.5386	13	20000	260000	168985	5.22785	4.83842	0.15047
	1.5386	8	20000	160000	103991	5.01699
	1.5386	15	2000	30000	19498.2	4.29
	1.5386	60	2000	120000	77993	4.89206
	1.5386	24	2000	48000	31197.2	4.49412
	1.5386	99	2000	198000	128688	5.10954
NM37	1.5386	7	20000	140000	90991.8	4.959	5.7655	0.222938
	1.5386	53	20000	1060000	688938	5.83818
	1.5386	229	20000	4580000	2.97673e+06	6.47374
	1.5386	45	20000	900000	584947	5.76712
	1.5386	118	20000	2360000	1.53386e+06	6.18579
	1.5386	18	20000	360000	233979	5.36918
NN31	1.5386	63	20000	1260000	818926	5.91324	5.63375	0.191822
	1.5386	5	20000	100000	64994.2	4.81287
	1.5386	60	20000	1200000	779930	5.89206
	1.5386	75	20000	1500000	974912	5.98897
	1.5386	16	20000	320000	207981	5.31802
	1.5386	58	20000	1160000	753932	5.87733

## Sheet: Figure2B
		Weght (g)	Colony number	Dilution	CFU	CFU/g	Log(CFU/g)	Ave	SE				Log(CFU/g)	SE			Tukey's HSD test (0 time)
0dpi	Pcal WT	0.45	6.8	10000	68000	151111	5.1793	5.81258	0.337391		0time	Pcal WT	5.81258	0.337391			SampleA-SampleB	p-value
		0.56	120	10000	1200000	2.14286e+06	6.33099					Pcal trpA	5.87939	0.286895			trpA-comple	0.981899
		0.65	55	10000	550000	846154	5.92745					Pcal trpA comp	5.82463	0.129723			WT-comple	0.659507
	Pcal trpA	0.49	88	10000	880000	1.79592e+06	6.25429	5.87939	0.286895		1dpi	Pcal WT	6.07796	0.205323			WT-trpA	0.749999
		0.53	62	10000	620000	1.16981e+06	6.06812					Pcal trpA	3.05828	0.0696127
		0.58	12	10000	120000	206897	5.31575					Pcal trpA comp	5.55964	0.148431
	Pcal tripA comp	0.62	72	10000	720000	1.16129e+06	6.06494	5.82463	0.129723		3dpi	Pcal WT	7.93822	0.177022
		0.6	25	10000	250000	416667	5.61979					Pcal trpA	3.88108	0.114039			Tukey's HSD test
		0.52	32	10000	320000	615385	5.78915					Pcal trpA comp	7.76067	0.0752461			SampleA-SampleB	p-value
											5dpi	Pcal WT	6.99044	0.206308			1-trpA-1-comple	4e-07
1dpi	Pcal WT	0.77	104	10000	1040000	1.35065e+06	6.13054	6.07796	0.205323			Pcal trpA	3.15386	0.240868			1-WT-1-comple	0.694663
		0.56	28	10000	280000	500000	5.69897					Pcal trpA comp	6.13768	0.203537			3-comple-1-comple	2.4e-06
		0.67	170	10000	1700000	2.53731e+06	6.40437										3-trpA-1-comple	8.81e-05
	Pcal trpA	0.6	5	100	500	833.333	2.92082	3.05828	0.0696127								3-WT-1-comple	8e-07
		0.5	7	100	700	1400	3.14613										5-comple-1-comple	0.374689
		0.78	10	100	1000	1282.05	3.10791										5-trpA-1-comple	7e-07
	Pcal tripA comp	0.87	42	10000	420000	482759	5.68373	5.55964	0.148431								5-Wt-1-comple	0.0005806
		0.98	18	10000	180000	183673	5.26405										1-WT-1-trpA	1e-07
		0.65	35	10000	350000	538462	5.73115										3-comple-1-trpA	0
																	3-trpA-1-trpA	0.0735441
3dpi	Pcal WT	0.69	100	1000000	100000000	1.44928e+08	8.16115	7.93822	0.177022								3-WT-1-trpA	0
		0.62	72	1000000	72000000	1.16129e+08	8.06494										5-comple-1-trpA	0
		0.49	19	1000000	19000000	3.87755e+07	7.58856										5-trpA-1-trpA	0.999976
	Pcal trpA	0.77	5	1000	5000	6493.51	3.81248	3.88108	0.114039								5-Wt-1-trpA	0
		0.75	4	1000	4000	5333.33	3.727										3-comple-1-WT	0.0002723
		0.63	8	1000	8000	12698.4	4.10375										3-trpA-1-WT	1.36e-05
	Pcal tripA comp	0.8	40	1000000	40000000	50000000	7.69897	7.76067	0.0752461								3-WT-1-WT	8.26e-05
		0.59	48	1000000	48000000	8.13559e+07	7.91039										5-comple-1-WT	0.999996
		0.68	32	1000000	32000000	4.70588e+07	7.67264										5-trpA-1-WT	2e-07
																	5-Wt-1-WT	0.0647549
5dpi	Pcal WT	0.71	36	100000	3600000	5.07042e+06	6.70504	6.99044	0.206308								3-trpA-3-comple	0
		0.65	160	100000	16000000	2.46154e+07	7.39121										3-WT-3-comple	0.997757
		0.6	45	100000	4500000	7500000	6.87506										5-comple-3-comple	0.0001332
	Pcal trpA	0.75	4	100	400	533.333	2.727	3.15386	0.240868								5-trpA-3-comple	0
		0.67	10	100	1000	1492.54	3.17393										5-Wt-3-comple	0.108363
		0.55	20	100	2000	3636.36	3.56067										3-WT-3-trpA	0
	Pcal tripA comp	0.76	12	100000	1200000	1.57895e+06	6.19837	6.13768	0.203537								5-comple-3-trpA	1.7e-06
		0.61	3.5	100000	350000	573770	5.75874										5-trpA-3-trpA	0.147003
		0.63	18	100000	1800000	2.85714e+06	6.45593										5-Wt-3-trpA	0
																	5-comple-3-WT	3.64e-05
																	5-trpA-3-WT	0
																	5-Wt-3-WT	0.0279397
																	5-trpA-5-comple	0
																	5-Wt-5-comple	0.0586095
																	5-Wt-5-trpA	0

## Sheet: Figure2D
	0dpi	Area (cm2)	Colony number	Dilution	CFU	CFU/cm2	Log(CFU/cm2)	Ave	SE				Log(CFU/cm2)	SE		Tukey's HSD test (0 time)
0dpi	Pcal WT	1.5386	112	20	2240	1455.87	3.16312	3.18628	0.0703375		0time	Pcal WT	3.18628	0.0703375		SampleA-SampleB	p-value
		1.5386	92	20	1840	1195.89	3.07769					Pcal trpA	2.98046	0.0339469		trpA-comple	0.156938
		1.5386	160	20	3200	2079.81	3.31802					Pcal tripA comp	3.15219	0.0373075		WT-comple	0.859428
	Pcal trpA	1.5386	85	20	1700	1104.9	3.04332	2.98046	0.0339469		1dpi	Pcal WT	4.73156	0.118745		WT-trpA	0.111358
		1.5386	72	20	1440	935.916	2.97124					Pcal trpA	2.87716	0.0473015
		1.5386	65	20	1300	844.924	2.92682					Pcal tripA comp	4.67001	0.0816837		Tukey's HSD test
	Pcal tripA comp	1.5386	118	20	2360	1533.86	3.18579	3.15219	0.0373075		3dpi	Pcal WT	7.23813	0.0991099		SampleA-SampleB	p-value
		1.5386	120	20	2400	1559.86	3.19309					Pcal trpA	4.31048	0.155298		1-trpA-1-comple	4.2e-06
		1.5386	92	20	1840	1195.89	3.07769					Pcal tripA comp	6.63891	0.286664		1-WT-1-comple	1
											5dpi	Pcal WT	6.85849	0.11414		3-comple-1-comple	1.1e-06
1dpi	Pcal WT	1.5386	55	2000	110000	71493.6	4.85427	4.73156	0.118745			Pcal trpA	2.60628	0.115128		3-trpA-1-comple	0.730235
		1.5386	54	2000	108000	70193.7	4.8463					Pcal tripA comp	6.45078	0.15796		3-WT-1-comple	0
		1.5386	24	2000	48000	31197.2	4.49412									5-comple-1-comple	4.6e-06
	Pcal trpA	1.5386	48	20	960	623.944	2.79515	2.87716	0.0473015							5-trpA-1-comple	6e-07
		1.5386	70	20	1400	909.918	2.959									5-Wt-1-comple	2e-07
		1.5386	58	20	1160	753.932	2.87733									1-WT-1-trpA	1.88e-05
	Pcal tripA comp	1.5386	52	2000	104000	67593.9	4.82991	4.67001	0.0816837							3-comple-1-trpA	0
		1.5386	32	2000	64000	41596.3	4.61905									3-trpA-1-trpA	7.92e-05
		1.5386	28	2000	56000	36396.7	4.56106									3-WT-1-trpA	0
																5-comple-1-trpA	0
3dpi	Pcal WT	1.5386	104	200000	20800000	1.35188e+07	7.13094	7.23813	0.0991099							5-trpA-1-trpA	0.920336
		1.5386	210	200000	42000000	2.72975e+07	7.43612									5-Wt-1-trpA	0
		1.5386	108	200000	21600000	1.40387e+07	7.14733									3-comple-1-WT	5.3e-06
	Pcal trpA	1.5386	27	2000	54000	35096.8	4.54527	4.31048	0.155298							3-trpA-1-WT	0.824492
		1.5386	8	2000	16000	10399.1	4.01699									3-WT-1-WT	1e-07
		1.5386	18	2000	36000	23397.9	4.36918									5-comple-1-WT	2.06e-05
	Pcal tripA comp	1.5386	9	200000	1800000	1.16989e+06	6.06815	6.63891	0.286664							5-trpA-1-WT	2.8e-06
		1.5386	58	200000	11600000	7.53932e+06	6.87733									5-Wt-1-WT	1.2e-06
		1.5386	72	200000	14400000	9.35916e+06	6.97124									3-trpA-3-comple	1e-07
																3-WT-3-comple	0.16795
5dpi	Pcal WT	1.5386	49	200000	9800000	6.36943e+06	6.8041	6.85849	0.11414							5-comple-3-comple	0.990086
		1.5386	92	200000	18400000	1.19589e+07	7.07769									5-trpA-3-comple	0
		1.5386	38	200000	7600000	4.93956e+06	6.69369									5-Wt-3-comple	0.974546
	Pcal trpA	1.5386	3	200	600	389.965	2.59103	2.60628	0.115128							3-WT-3-trpA	0
		1.5386	2	200	400	259.977	2.41493									5-comple-3-trpA	3e-07
		1.5386	5	200	1000	649.942	2.81287									5-trpA-3-trpA	8.3e-06
	Pcal tripA comp	1.5386	10.5	200000	2100000	1.36488e+06	6.13509	6.45078	0.15796							5-Wt-3-trpA	0
		1.5386	32	200000	6400000	4.15963e+06	6.61905									5-comple-3-WT	0.0321488
		1.5386	30.5	200000	6100000	3.96464e+06	6.5982									5-trpA-3-WT	0
																5-Wt-3-WT	0.674949
																5-trpA-5-comple	0
																5-Wt-5-comple	0.595111
																5-Wt-5-trpA	0

## Sheet: Figure2F
		Weght (g)	Colony number	Dilution	CFU	CFU/g	Log(CFU/g)	Ave	SE				Log(CFU/g)	SE		Tukey's HSD test (0 time)
0dpi	Pcal WT	0.15	9	200	1800	12000	4.07918	4.58394	0.469911		0time	Pcal WT	4.58394	0.469911		SampleA-SampleB	p-value
		0.17	12	200	2400	14117.6	4.14976					Pcal trpA	4.22328	0.195113		trpA-comple	0.778919
		0.12	200	200	40000	333333	5.52288					Pcal trpA comp	4.57114	0.348972		WT-comple	0.887505
	Pcal trpA	0.18	15	200	3000	16666.7	4.22185	4.22328	0.195113		1dpi	Pcal WT	3.17309	0.128191		WT-trpA	0.560298
		0.17	31	200	6200	36470.6	4.56194					Pcal trpA	2.88485	0.155936
		0.13	5	200	1000	7692.31	3.88606					Pcal trpA comp	3.25085	0.126576		Tukey's HSD test
	Pcal tripA comp	0.15	120	200	24000	160000	5.20412	4.57114	0.348972		3dpi	Pcal WT	6.84258	0.179097		SampleA-SampleB	p-value
		0.16	8	200	1600	10000	4					Pcal trpA	3.9277	0.234442		1-trpA-1-comple	0.999879
		0.13	21	200	4200	32307.7	4.50931					Pcal trpA comp	5.55675	0.463799		1-WT-1-comple	1
											5dpi	Pcal WT	7.83709	0.196571		3-comple-1-comple	0.0237329
1dpi	Pcal WT	0.11	1	200	200	1818.18	3.25964	3.17309	0.128191			Pcal trpA	3.19956	0.478238		3-trpA-1-comple	0.976502
		0.12	5	20	100	833.333	2.92082					Pcal trpA comp	5.6773	0.611527		3-WT-1-comple	7.94e-05
		0.11	12	20	240	2181.82	3.33882									5-comple-1-comple	0.0145788
	Pcal trpA	0.12	4.5	20	90	750	2.87506	2.88485	0.155936							5-trpA-1-comple	1
		0.12	2.5	20	50	416.667	2.61979									5-Wt-1-comple	8e-07
		0.09	6.5	20	130	1444.44	3.1597									1-WT-1-trpA	0.999998
	Pcal tripA comp	0.08	4	20	80	1000	3	3.25085	0.126576							3-comple-1-trpA	0.0051746
		0.09	10	20	200	2222.22	3.34679									3-trpA-1-trpA	0.781858
		0.11	14	20	280	2545.45	3.40577									3-WT-1-trpA	1.44e-05
																5-comple-1-trpA	0.0030579
3dpi	Pcal WT	0.28	52	20000	1040000	3.71429e+06	6.56988	6.84258	0.179097							5-trpA-1-trpA	0.999885
		0.34	46	20000	920000	2.70588e+06	6.43231									5-Wt-1-trpA	1e-07
		0.32	38	20000	760000	2375000	6.37566									3-comple-1-WT	0.0520062
		0.2	170	20000	3400000	17000000	7.23045									3-trpA-1-WT	0.973392
		0.25	140	20000	2800000	11200000	7.04922									3-WT-1-WT	0.0004542
		0.24	300	20000	6000000	25000000	7.39794									5-comple-1-WT	0.0350595
	Pcal trpA	0.32	75	20	1500	4687.5	3.67094	3.9277	0.234442							5-trpA-1-WT	1
		0.36	28	20	560	1555.56	3.19189									5-Wt-1-WT	8.2e-06
		0.42	59	20	1180	2809.52	3.44863									3-trpA-3-comple	0.0764929
		0.3	25	200	5000	16666.7	4.22185									3-WT-3-comple	0.284287
		0.31	38	200	7600	24516.1	4.38945									5-comple-3-comple	1
		0.25	55	200	11000	44000	4.64345									5-trpA-3-comple	0.0020117
	Pcal tripA comp	0.24	24	2000	48000	200000	5.30103	5.55675	0.463799							5-Wt-3-comple	0.0030527
		0.37	1.3	2000	2600	7027.03	3.84677									3-WT-3-trpA	8.79e-05
		0.32	8	2000	16000	50000	4.69897									5-comple-3-trpA	0.0446229
		0.34	45	20000	900000	2.64706e+06	6.42276									5-trpA-3-trpA	0.892445
		0.33	85	20000	1700000	5.15152e+06	6.71193									5-Wt-3-trpA	3e-07
		0.28	32	20000	640000	2.28571e+06	6.35902									5-comple-3-WT	0.408842
																5-trpA-3-WT	1.4e-06
5dpi	Pcal WT	0.29	28	200000	5600000	1.93103e+07	7.28579	7.83709	0.196571							5-Wt-3-WT	0.615317
		0.3	35	200000	7000000	2.33333e+07	7.36798									5-trpA-5-comple	0.001036
		0.28	72	200000	14400000	5.14286e+07	7.7112									5-Wt-5-comple	0.0058061
		0.28	25	2000000	50000000	1.78571e+08	8.25181									5-Wt-5-trpA	0
		0.22	35	2000000	70000000	3.18182e+08	8.50268
		0.3	12	2000000	24000000	80000000	7.90309
	Pcal trpA	0.26	2	20	40	153.846	2.18709	3.19956	0.478238
		0.28	1	20	20	71.4286	1.85387
		0.24	3	20	60	250	2.39794
		0.25	15	200	3000	12000	4.07918
		0.3	28	200	5600	18666.7	4.27107
		0.25	32	200	6400	25600	4.40824
	Pcal tripA comp	0.35	4	2000	8000	22857.1	4.35902	5.6773	0.611527
		0.36	6	2000	12000	33333.3	4.52288
		0.29	2	2000	4000	13793.1	4.13966
		0.22	72	20000	1440000	6.54545e+06	6.81594
		0.3	52	200000	10400000	3.46667e+07	7.53991
		0.28	68	20000	1360000	4.85714e+06	6.68638

## Sheet: Figure2H
		Area (cm2)	Colony number	Dilution	CFU	CFU/cm2	Log(CFU/cm2)	Ave	SE				Log(CFU/cm2)	SE		Tukey's HSD test (0 time)
0dpi	Pcal WT	7.5	56	200	11200	1493.33	3.17416	3.0838	0.0767688		0time	Pcal WT	3.0838	0.0767688		SampleA-SampleB	p-value
		7	49	200	9800	1400	3.14613					Pcal trpA	3.32731	0.0443503		trpA-comple	0.926677
		7.5	32	200	6400	853.333	2.93112					Pcal tripA comp	3.28069	0.116356		WT-comple	0.27993
	Pcal trpA	7	72	200	14400	2057.14	3.31326	3.32731	0.0443503		1dpi	Pcal WT	3.38272	0.431139		WT-trpA	0.189912
		7.5	68	200	13600	1813.33	3.25848					Pcal trpA	2.40211	0.116387
		7	90	200	18000	2571.43	3.41017					Pcal tripA comp	2.45436	0.0946758		Tukey's HSD test
	Pcal tripA comp	8	95	200	19000	2375	3.37566	3.28069	0.116356		3dpi	Pcal WT	6.06538	0.116277		SampleA-SampleB	p-value
		7.5	98	200	19600	2613.33	3.41719					Pcal trpA	1.80866	0.102804		1-trpA-1-comple	1
		7.5	42	200	8400	1120	3.04922					Pcal tripA comp	4.65077	0.121948		1-WT-1-comple	0.1105
											5dpi	Pcal WT	7.60679	0.15343		3-comple-1-comple	4.3e-06
1dpi	Pcal WT	7	10	2000	20000	2857.14	3.45593	3.38272	0.431139			Pcal trpA	2.03095	0.0736912		3-trpA-1-comple	0.292346
		7	14	200	2800	400	2.60206					Pcal tripA comp	5.15582	0.0786638		3-WT-1-comple	0
		6.5	4	20000	80000	12307.7	4.09018									5-comple-1-comple	2e-07
	Pcal trpA	6.5	14	200	2800	430.769	2.63424	2.40211	0.116387							5-trpA-1-comple	0.768484
		7.5	7	200	1400	186.667	2.27107									5-Wt-1-comple	0
		6	6	200	1200	200	2.30103									1-WT-1-trpA	0.0794386
	Pcal tripA comp	6.5	11	200	2200	338.462	2.52951	2.45436	0.0946758							3-comple-1-trpA	3.1e-06
		6.5	6	200	1200	184.615	2.26627									3-trpA-1-trpA	0.389118
		6.5	12	200	2400	369.231	2.5673									3-WT-1-trpA	0
																5-comple-1-trpA	2e-07
3dpi	Pcal WT	10.5	36	200000	7200000	685714	5.83614	6.06538	0.116277							5-trpA-1-trpA	0.865834
		10	70	200000	14000000	1400000	6.14613									5-Wt-1-trpA	0
		11	90	200000	18000000	1.63636e+06	6.21388									3-comple-1-WT	0.0068272
	Pcal trpA	10	3	200	600	60	1.77815	1.80866	0.102804							3-trpA-1-WT	0.0013578
		10	5	200	1000	100	2									3-WT-1-WT	1e-06
		9	2	200	400	44.4444	1.64782									5-comple-1-WT	0.0002182
	Pcal tripA comp	10	24	20000	480000	48000	4.68124	4.65077	0.121948							5-trpA-1-WT	0.0063444
		10	35	20000	700000	70000	4.8451									5-Wt-1-WT	0
		9	12	20000	240000	26666.7	4.42597									3-trpA-3-comple	1e-07
																3-WT-3-comple	0.001004
5dpi	Pcal WT	7.5	180	2000000	360000000	48000000	7.68124	7.60679	0.15343							5-comple-3-comple	0.584447
		7.5	252	2000000	504000000	67200000	7.82737									5-trpA-3-comple	3e-07
		8	82	2000000	164000000	20500000	7.31175									5-Wt-3-comple	1e-07
	Pcal trpA	7.5	30	20	600	80	1.90309	2.03095	0.0736912							3-WT-3-trpA	0
		8	43	20	860	107.5	2.03141									5-comple-3-trpA	0
		7.5	54	20	1080	144	2.15836									5-trpA-3-trpA	0.992227
	Pcal tripA comp	7	52	20000	1040000	148571	5.17194	5.15582	0.0786638							5-Wt-3-trpA	0
		7	36	20000	720000	102857	5.01223									5-comple-3-WT	0.0493121
		7.5	72	20000	1440000	192000	5.2833									5-trpA-3-WT	0
																5-Wt-3-WT	0.000386
																5-trpA-5-comple	0
																5-Wt-5-comple	9e-07
																5-Wt-5-trpA	0

## Sheet: Figure3
			Weght (g)	Colony number	Dilution	CFU	CFU/g	Log(CFU/g)	Ave	SE
epi	1dpi	WT	0.18	12	200000	2400000	1.33333e+07	7.12494	6.87235	0.145479										Tukey's HSD test
			0.22	16	200000	3200000	1.45455e+07	7.16273					1dpi			2dpi				SampleA-SampleB	p-value
			0.256	4	200000	800000	3125000	6.49485					WT	trpA	pDSK-trpA	WT	trpA	pDSK-trpA		pDSK-2-pDSK-1	0
			0.22	20	200000	4000000	1.81818e+07	7.25964				Log(CFU/g)	6.87235	4.98427	6.21426	8.62476	4.93582	8.2381		trpA-1-pDSK-1	2.21e-05
			0.28	21	200000	4200000	1.5e+07	7.17609				SE	0.145479	0.186798	0.197401	0.0893341	0.219702	0.111282		trpA-2-pDSK-1	0.0001066
			0.24	14	200000	2800000	1.16667e+07	7.06695												WT-1-pDSK-1	0.0856122
			0.27	2	200000	400000	1.48148e+06	6.1707												WT-2-pDSK-1	0
			0.24	4	200000	800000	3.33333e+06	6.52288												trpA-1-pDSK-2	0
		trpA	0.19	87	200	17400	91578.9	4.9618	4.98427	0.186798										trpA-2-pDSK-2	0
			0.21	22	2000	44000	209524	5.32123												WT-1-pDSK-2	3.6e-06
			0.21	13	2000	26000	123810	5.09275												WT-2-pDSK-2	0.51755
			0.224	23	2000	46000	205357	5.31251												trpA-2-trpA-1	0.999957
			0.23	7	200	1400	6086.96	3.7844												WT-1-trpA-1	0
			0.24	74	200	14800	61666.7	4.79005												WT-2-trpA-1	0
			0.29	40	2000	80000	275862	5.44069												WT-1-trpA-2	1e-07
			0.27	2	20000	40000	148148	5.1707												WT-2-trpA-2	0
		pDSK-trpA	0.2	43	20000	860000	4300000	6.63347	6.21426	0.197401										WT-2-WT-1	0
			0.27	88	20000	1760000	6.51852e+06	6.81415
			0.25	158	20000	3160000	12640000	7.10175
			0.32	97	2000	194000	606250	5.78265
			0.24	17	20000	340000	1.41667e+06	6.15127
			0.25	72	2000	144000	576000	5.76042
			0.26	64	2000	128000	492308	5.69224
			0.23	69	2000	138000	600000	5.77815
	2dpi	WT	0.28	99	2000000	198000000	7.07143e+08	8.84951	8.62476	0.0893341
			0.26	50	2000000	100000000	3.84615e+08	8.58503
			0.23	51	2000000	102000000	4.43478e+08	8.64687
			0.28	158	2000000	316000000	1.12857e+09	9.05253
			0.22	56	2000000	112000000	5.09091e+08	8.7068
			0.23	38	2000000	76000000	3.30435e+08	8.51909
			0.23	21	2000000	42000000	1.82609e+08	8.26152
			0.21	25	2000000	50000000	2.38095e+08	8.37675
			0.25	35	2000000	70000000	280000000	8.44716
		trpA	0.23	56	2000	112000	486957	5.68749	4.93582	0.219702
			0.28	20	2000	40000	142857	5.1549
			0.25	7	2000	14000	56000	4.74819
			0.29	60	200	12000	41379.3	4.61678
			0.27	4	2000	8000	29629.6	4.47173
		pDSK-trpA	0.25	11	2000000	22000000	88000000	7.94448	8.2381	0.111282
			0.28	15	2000000	30000000	1.07143e+08	8.02996
			0.24	13	2000000	26000000	1.08333e+08	8.03476
			0.37	33	2000000	66000000	1.78378e+08	8.25134
			0.27	54	2000000	108000000	400000000	8.60206
			0.23	47	2000000	94000000	4.08696e+08	8.6114
			0.25	91	200000	18200000	72800000	7.86213
			0.27	50	2000000	100000000	3.7037e+08	8.56864

## Sheet: Figure4A
24h	OD600	Ave	SE			Ave	SE		Tukey's HSD test
WT	0.48	0.526667	0.0371184		WT	0.526667	0.0371184		SampleA-SampleB	p-value
	0.5				trpA	0.106667	0.00666667		trp10-trp1	2.5e-06
	0.6				trpA+Trp 1uM	0.196667	0.0218581		trp100-trp1	1e-07
trpA	0.1	0.106667	0.00666667		trpA+Trp 10uM	0.546667	0.00333333		trpA-trp1	0.0474279
	0.1				trpA+Trp 100uM	0.696667	0.0145297		WT-trp1	6e-06
	0.12								trp100-trp10	0.0021399
trpA+Trp 1uM	0.24	0.196667	0.0218581						trpA-trp10	4e-07
	0.18								WT-trp10	0.999956
	0.17								trpA-trp100	0
trpA+Trp 10uM	0.54	0.546667	0.00333333						WT-trp100	0.0053254
	0.55								WT-trpA	9e-07
	0.55
trpA+Trp 100uM	0.7	0.696667	0.0145297
	0.67
	0.72

## Sheet: Figure4B
5dpi	Area (cm2)	Colony number	Dilution	CFU	CFU/cm2	Log(CFU/cm2)	Ave	SE			Log(CFU/cm2)	SE		Tukey's HSD test
Pcal WT	1.5386	86	20000	1720000	1.1179e+06	6.0484	5.55976	0.175915		WT	5.55976	0.175915		SampleA-SampleB	p-value
	1.5386	53	20000	1060000	688938	5.83818				trpA	1.45015	0.139155		trp1-trp0.1	0.889945
	1.5386	43	20000	860000	558950	5.74737				trpA+trp0.1	2.11764	0.245367		trp10-trp0.1	0.0219953
	1.5386	10	20000	200000	129988	5.1139				trpA+trp1	2.6254	0.212816		trp50-trp0.1	6.43e-05
	1.5386	35	20000	700000	454959	5.65797				trpA+trp10	3.69694	0.507428		trpA-trp0.1	0.725567
	1.5386	69	2000	138000	89691.9	4.95275				trpA+trp50	4.7746	0.271606		WT-trp0.1	3.2e-06
Pcal trpA	1.5386	3	20	60	38.9965	1.59103	1.45015	0.139155						trp10-trp1	0.164273
	1.5386	1	20	20	12.9988	1.1139								trp50-trp1	0.0004809
	1.5386	4	20	80	51.9953	1.71596								trpA-trp1	0.129846
	1.5386	1	20	20	12.9988	1.1139								WT-trp1	1.77e-05
	1.5386	4	20	80	51.9953	1.71596								trp50-trp10	0.126938
trpA+trp0.1	1.5386	3	20	60	38.9965	1.59103	2.11764	0.245367						trpA-trp10	0.0002709
	1.5386	3	200	600	389.965	2.59103								WT-trp10	0.0045184
	1.5386	23	20	460	298.973	2.47563								trpA-trp50	6e-07
	1.5386	5	20	100	64.9942	1.81287								WT-trp50	0.606411
trpA+trp1	1.5386	8	20	160	103.991	2.01699	2.6254	0.212816						WT-trpA	0
	1.5386	16	200	3200	2079.81	3.31802
	1.5386	24	20	480	311.972	2.49412
	1.5386	47	20	940	610.945	2.786
	1.5386	25	20	500	324.971	2.51184
trpA+trp10	1.5386	12	20	240	155.986	2.19309	3.69694	0.507428
	1.5386	12	20	240	155.986	2.19309
	1.5386	60	200	12000	7799.3	3.89206
	1.5386	9	2000	18000	11698.9	4.06815
	1.5386	45	2000	90000	58494.7	4.76712
	1.5386	9	20000	180000	116989	5.06815
trpA+trp50	1.5386	70	200	14000	9099.18	3.959	4.7746	0.271606
	1.5386	72	2000	144000	93591.6	4.97124
	1.5386	7	2000	14000	9099.18	3.959
	1.5386	10	20000	200000	129988	5.1139
	1.5386	9	20000	180000	116989	5.06815
	1.5386	29	20000	580000	376966	5.5763

## Sheet: Figure5A
recA				Geometric mean		avrPto						avrPto		average	SE
WT3h	29.89	29.56	0.795536	0.707107		WT3h	26.83	26.6267	0.868541	1.2283		WT3h	1.2283	1.02353	0.0875197		WT3h	trpA3h	WT6h	trpA6h		Tukey's HSD test
	29		1.47427	1.42405			25.84		1.72508	1.21139			1.21139				1.02353	0.0733298	1.2518	0.0433361		SampleA-SampleB	p-value
	29.79		0.852635	0.993092			27.21		0.66742	0.672062			0.672062				0.0875197	0.0216591	0.161995	0.010314		trpA6h-trpA3h	0.998856
trpA3h	29.94		0.768438	0.952638		trpA3h	30.89		0.0520725	0.0546614			1.3138									WT3h-trpA3h	0.0003683
	29.83		0.82932	0.820742			32.3		0.0195955	0.0238754			0.919391									WT6h-trpA3h	2.6e-06
	29.78		0.858565	0.849685			33		0.0120624	0.0141964			0.91304									WT3h-trpA6h	0.0002613
WT6h	29.14		1.33793	1.79626		WT6h	25.57		2.08012	1.15803			0.906733									WT6h-trpA6h	1.9e-06
	28.4		2.23457	2.87787			25.09		2.90123	1.00812		trpA3h	0.0546614	0.0733298	0.0216591							WT6h-WT3h	0.294527
	30.4		0.558644	0.671286			26.67		0.97041	1.4456			0.0238754
trpA6h	31.58		0.246558	0.259715		trpA6h	34		0.00603122	0.0232225			0.0141964
	29.05		1.42405	1.36131			33.49		0.00858877	0.00630917			0.184124
	31.02		0.363493	0.45376			32.82		0.0136654	0.0301158			0.0858969
													0.0973112
oprF													0.0532435
WT3h	25.48	24.81	0.628507									WT6h	1.15803	1.2518	0.161995
	24.35		1.37554										1.00812
	24.6		1.15669										1.4456
trpA3h	24.57		1.18099										1.17589
	25.11		0.812252										1.95037
	25.06		0.840896										0.571866
WT6h	23.54		2.41162										1.45271
	22.92		3.70635									trpA6h	0.0232225	0.0433361	0.010314
	25.12		0.806642										0.00630917
trpA6h	26.68		0.273573										0.0301158
	24.43		1.30134										0.0829709
	25.63		0.566442										0.0352496
													0.0547404
recA				Geometric mean		avrPto							0.0707439
WT3h	29.94	29.99	1.03526	1.18612		WT3h	27.63	28.27	1.55833	1.3138
	30.4		0.752623	0.758515			28.79		0.697372	0.919391
	29.71		1.21419	1.21525			28.12		1.10957	0.91304
	29.91		1.05702	0.914624			28.54		0.82932	0.906733
trpA3h	31.84		0.277392	0.406478		trpA3h	32.01		0.0748424	0.184124
	30		0.993092	1.30247			31.43		0.111878	0.0858969
	31.51		0.348686	0.451016			32.78		0.0438889	0.0973112
	29.68		1.23971	1.69496			31.74		0.0902456	0.0532435
WT6h	30.54		0.68302	0.956774		WT6h	28.1		1.12506	1.17589
	31.99		0.25	0.286429			29.11		0.558644	1.95037
	29.61		1.30134	1.51178			28.48		0.864537	0.571866
	30.01		0.986233	1.05793			27.65		1.53688	1.45271
trpA6h	32.11		0.230047	0.303812		trpA6h	33.58		0.0252076	0.0829709
	31.25		0.417544	0.631235			33.76		0.0222508	0.0352496
	31.39		0.378929	0.451016			33.61		0.0246888	0.0547404
	32.13		0.22688	0.208953			34.35		0.0147822	0.0707439
oprF
WT3h	24.08	24.5225	1.35896
	24.91		0.764453
	24.24		1.2163
	24.86		0.791412
trpA3h	25.27		0.595635
	23.75		1.70823
	25.3		0.583377
	23.31		2.31739
WT6h	24.1		1.34025
	26.13		0.328167
	23.71		1.75625
	24.34		1.13485
trpA6h	25.84		0.40123
	24.59		0.95429
	25.42		0.536816
	26.9		0.192443

## Sheet: Figure5B
recA				Geometric mean		avrE1						avrE1		average	SE
WT3h	29.89	29.56	0.795536	0.707107		WT3h	32.84	32.6033	0.848704	1.20025		WT3h	1.20025	1.03869	0.108957		WT3h	trpA3h	WT6h	trpA6h		Tukey's HSD test
	29		1.47427	1.42405			31.93		1.59475	1.11987			1.11987				1.03869	0.351642	0.384262	0.3846		SampleA-SampleB	p-value
	29.79		0.852635	0.993092			33.04		0.73884	0.743979			0.743979				0.108957	0.144198	0.0728227	0.147109		trpA6h-trpA3h	0.999999
trpA3h	29.94		0.768438	0.952638		trpA3h	35.92		0.100365	0.105355			1.16979									WT3h-trpA3h	0.0047939
	29.83		0.82932	0.820742			35.11		0.175962	0.214394			1.4352									WT6h-trpA3h	0.907432
	29.78		0.858565	0.849685			36.7		0.0584495	0.0687896			0.586926									WT3h-trpA6h	0.0046556
WT6h	29.14		1.33793	1.79626		WT6h	33.83		0.427304	0.237885			1.01484									WT6h-trpA6h	0.902721
	28.4		2.23457	2.87787			32.51		1.06683	0.370702		trpA3h	0.105355	0.351642	0.144198							WT6h-WT3h	0.0214753
	30.4		0.558644	0.671286			34.56		0.257623	0.383775			0.214394
trpA6h	31.58		0.246558	0.259715		trpA6h	44.63		0.000239669	0.000922818			0.0687896
	29.05		1.42405	1.36131			35.2		0.16532	0.121441			0.098158
	31.02		0.363493	0.45376			36.72		0.0576448	0.127038			0.927391
													0.163941
oprF													0.883468
WT3h	25.48	24.81	0.628507									WT6h	0.237885	0.384262	0.0728227
	24.35		1.37554										0.370702
	24.6		1.15669										0.383775
trpA3h	24.57		1.18099										0.523496
	25.11		0.812252										0.190287
	25.06		0.840896										0.245918
WT6h	23.54		2.41162										0.737774
	22.92		3.70635									trpA6h	0.000922818	0.3846	0.147109
	25.12		0.806642										0.121441
trpA6h	26.68		0.273573										0.127038
	24.43		1.30134										0.973498
	25.63		0.566442										0.821453
													0.122534
recA				Geometric mean		avrE1							0.525313
WT3h	29.94	29.99	1.03526	1.18612		WT3h	33.18	33.6525	1.38751	1.16979
	30.4		0.752623	0.758515			33.53		1.08862	1.4352
	29.71		1.21419	1.21525			34.14		0.71326	0.586926
	29.91		1.05702	0.914624			33.76		0.928195	1.01484
trpA3h	31.84		0.277392	0.406478		trpA3h	38.3		0.0398991	0.098158
	30		0.993092	1.30247			33.38		1.2079	0.927391
	31.51		0.348686	0.451016			37.41		0.0739401	0.163941
	29.68		1.23971	1.69496			33.07		1.49744	0.883468
WT6h	30.54		0.68302	0.956774		WT6h	34.65		0.500867	0.523496
	31.99		0.25	0.286429			37.85		0.0545038	0.190287
	29.61		1.30134	1.51178			35.08		0.371775	0.245918
	30.01		0.986233	1.05793			34.01		0.780516	0.737774
trpA6h	32.11		0.230047	0.303812		trpA6h	35.41		0.29576	0.973498
	31.25		0.417544	0.631235			34.6		0.51853	0.821453
	31.39		0.378929	0.451016			37.83		0.0552646	0.122534
	32.13		0.22688	0.208953			36.84		0.109766	0.525313
oprF
WT3h	24.08	24.5225	1.35896
	24.91		0.764453
	24.24		1.2163
	24.86		0.791412
trpA3h	25.27		0.595635
	23.75		1.70823
	25.3		0.583377
	23.31		2.31739
WT6h	24.1		1.34025
	26.13		0.328167
	23.71		1.75625
	24.34		1.13485
trpA6h	25.84		0.40123
	24.59		0.95429
	25.42		0.536816
	26.9		0.192443

[truncated: 13 more sheets: Figure5C, Figure5D, Figure5E, Figure5F, Figure5G, Figure5H, Figure5I, Figure5J, Figure6, SupFigS1, SupFigS2, FigureS3, SupFigS4]
